# Supplementary material for: Sustainability of Yam Daabo Interventions' Effects on Contraception use in Burkina Faso 12 Months after the end of Interventions
Source: Research Square preprint supplement (doi:10.21203/rs.3.rs-113062/v1), 2020-12-28
Supplement: Supplementary file 1 [file 1a94b3a609c5e3ad34237d07.docx]

Table 1: baseline characteristics of women who were interviewed at 24-month postpartum (inclusion data)

|  | **Intervention n=238**  **n(%)** | **Control n=247**  **n(%)** |
| --- | --- | --- |
| Women's age |  |  |
| Under 20 | 31(13.0) | 46(18.6) |
| 20 - 29 | 123(51.7) | 133(53.8) |
| 30 and more | 84(35.3) | 68(27.5) |
| Number of pregnancies |  |  |
| None | 36(15.1) | 47(19.0) |
| 1 - 3 | 106(44.5) | 123(49.8) |
| 4 - 6 | 77(32.4) | 63(25.5) |
| ≥ 7 | 19(8.0) | 14(5.7) |
| Number of living children |  |  |
| None | 42(17.6) | 53(21.5) |
| 1 - 3 | 121(50.8) | 131(53.0) |
| ≥ 4 | 75(31.5) | 63(25.5) |
| Number of previous live births |  |  |
| None | 42(17.6) | 49(19.8) |
| 1 - 3 | 112(47.1) | 126(51.0) |
| ≥ 4 | 84(35.3) | 72(29.1) |
| Number of stillbirths |  |  |
| None | 224(94.1) | 222(89.9) |
| ≥ 1 stillbirth | 14(5.9) | 25(10.1) |
| Number of abortion* |  |  |
| None | 206(86.6) | 231(93.5) |
| ≥ 1 abortion | 32(13.4) | 16(6.5) |
| Education status |  |  |
| No education | 163(68.5) | 174(70.4) |
| Primary school | 35(14.7) | 36(14.6) |
| Secondary/Tertiary | 40(16.8) | 37(15.0) |
| Marital status |  |  |
| Not in union | 2(0.8) | 4(1.6) |
| In union | 236(99.2) | 243(98.4) |
| Occupation |  |  |
| No occupation | 1(0.4) | 0(0.0) |
| Student | 24(10.1) | 19(7.7) |
| Housewife/Farmer | 185(77.7) | 201(81.4) |
| Salaried employee | 2(0.8) | 5(2.0) |
| Tradeswoman | 26(10.9) | 22(8.9) |
| Family planning use prior to the trial |  |  |
| No | 161(67.6) | 178(72.1) |
| Yes | 77(32.4) | 69(27.9) |
| Current pregnancy planned |  |  |
| Yes | 115(48.3) | 113(45.7) |
| No | 123(51.7) | 134(54.3) |

* : significant difference (p=0,01)

Table 2: contraception use at 24-month

|  | **Intervention group**  **n/N** | **Control group**  **n/N** | **p** | **Adjusted prevalence ratio (95%CI)** |
| --- | --- | --- | --- | --- |
| Modern and appropriate methods | 138/238 (58.0%) | 117/247 (47.4%) | 0.191 | 1.21 (0.91-1.61) |
| Long-acting methods | 89/238 (37.4%) | 68/247 (27.5%) | 0.007 | 1.35 (1.08-1.69) |
| Short-acting methods | 49/238 (20.6%) | 49/247 (19.8%) | 0.992 | 1.00 (0.55-1.81) |
| Non-modern or non-appropriate methods | 1/238 (0.4%) | 0/247 (0%) | -- | -- |
| No contraceptive method | 100/238 (42%) | 130/247 (53%) | 0.224 | 0.8 (0.56-1.15) |
